# Supplementary material for: Information Provision Regarding Health-Related Direct-to-Consumer Genetic Testing for Dutch Consumers: An in-Depth Content Analysis of Sellers’ Websites
Source: Genes (Basel). 2024 Apr 20;15(4):517. doi: 10.3390/genes15040517 (PMC11049909; doi:10.3390/genes15040517)
Supplement: Supplementary file 1 [file genes-15-00517-s001.zip]

Archive with 4 entries (4 files):
- 20240418_ Supplementary Materials Document S2 Table S1-S5.docx
- 20240418_ Supplementary Materials Document S2 Table S1-S5.pdf
- 20240418_Supplementary Materials Document S1.docx
- 20240418_Supplementary Materials Document S1.pdf
